# Supplementary material for: Determinants of aortic growth rate in patients with bicuspid aortic valve by cardiovascular magnetic resonance
Source: PubMed Central journal article supplement (PMC6861085; doi:10.1136/openhrt-2019-001095), 2019-11-02
Supplement: openhrt-2019-001095supp001.pdf [file openhrt-2019-001095supp001.pdf]

## Supplementary Material

Table A: Diameters, area values and aortic growth rate as indexed area of AAo and SoV both in end-systole and end-diastole, corresponding to the subgroups of CoA, NoCoA, reCoA, valve type 0, type 1 with RL cusp fusion and RN cusp fusion.

| Variables                      | SoV ES                              |                                     |                                               |                                               |                                                               | SoV ED                              |                                     |                                               |                                               |                                                               |
|--------------------------------|-------------------------------------|-------------------------------------|-----------------------------------------------|-----------------------------------------------|---------------------------------------------------------------|-------------------------------------|-------------------------------------|-----------------------------------------------|-----------------------------------------------|---------------------------------------------------------------|
|                                | Diameter time 1 (mm, mean $\pm$ SD) | Diameter time 2 (mm, mean $\pm$ SD) | Area time 1 (cm <sup>2</sup> , mean $\pm$ SD) | Area time 2 (cm <sup>2</sup> , mean $\pm$ SD) | Growth rate area (area, cm <sup>2</sup> /m*yr, mean $\pm$ SD) | Diameter time 1 (mm, mean $\pm$ SD) | Diameter time 2 (mm, mean $\pm$ SD) | Area time 1 (cm <sup>2</sup> , mean $\pm$ SD) | Area time 2 (cm <sup>2</sup> , mean $\pm$ SD) | Growth rate area (area, cm <sup>2</sup> /m*yr, mean $\pm$ SD) |
| <b>CoA</b>                     | 32.1 $\pm$ 5.1                      | 32.8 $\pm$ 5.4                      | 826.4 $\pm$ 257.6                             | 863.4 $\pm$ 285.3                             | 0.05 $\pm$ 0.09                                               | 31.2 $\pm$ 5.3                      | 31.9 $\pm$ 5.5                      | 785.7 $\pm$ 261.2                             | 821.8 $\pm$ 282.7                             | 0.05 $\pm$ 0.09                                               |
| <b>NoCoA</b>                   | 35.6 $\pm$ 4.5                      | 36.5 $\pm$ 4.6                      | 1004.4 $\pm$ 255.2                            | 1061.5 $\pm$ 266.8                            | 0.2 $\pm$ 0.3                                                 | 34.7 $\pm$ 4.6                      | 35.6 $\pm$ 4.7                      | 959.9 $\pm$ 252.7                             | 1010.9 $\pm$ 265.7                            | 0.1 $\pm$ 0.2                                                 |
| <b>reCoA</b>                   | 31.6 $\pm$ 5.2                      | 32.2 $\pm$ 5.5                      | 806.0 $\pm$ 272.9                             | 838.6 $\pm$ 300.9                             | 0.05 $\pm$ 0.09                                               | 30.8 $\pm$ 5.4                      | 31.4 $\pm$ 5.6                      | 765.7 $\pm$ 274.5                             | 796.3 $\pm$ 294.1                             | 0.04 $\pm$ 0.06                                               |
| <b>Valve type 0</b>            | 32.4 $\pm$ 5.3                      | 33.1 $\pm$ 5.6                      | 839.4 $\pm$ 278.8                             | 880.7 $\pm$ 308.3                             | 0.08 $\pm$ 0.1                                                | 31.3 $\pm$ 5.6                      | 32.1 $\pm$ 5.8                      | 786.5 $\pm$ 286.0                             | 828.0 $\pm$ 313.9                             | 0.08 $\pm$ 0.2                                                |
| <b>Valve type 1, RL fusion</b> | 33.9 $\pm$ 5.2                      | 34.7 $\pm$ 5.4                      | 919.3 $\pm$ 396.6                             | 919.3 $\pm$ 277.2                             | 0.1 $\pm$ 0.2                                                 | 33.1 $\pm$ 5.3                      | 33.8 $\pm$ 5.5                      | 878.1 $\pm$ 276.1                             | 920.9 $\pm$ 294.3                             | 0.08 $\pm$ 0.2                                                |
| <b>Valve type 1, RN fusion</b> | 35.6 $\pm$ 4.1                      | 36.9 $\pm$ 3.9                      | 1005.6 $\pm$ 233.7                            | 1079.5 $\pm$ 229.4                            | 0.3 $\pm$ 0.5                                                 | 34.9 $\pm$ 4.2                      | 36.1 $\pm$ 4.1                      | 966.6 $\pm$ 232.3                             | 1031.1 $\pm$ 236.2                            | 0.2 $\pm$ 0.3                                                 |

| Variables                      | AAo ES                              |                                     |                                               |                                               |                                                               | AAo ED                              |                                     |                                               |                                               |                                                               |
|--------------------------------|-------------------------------------|-------------------------------------|-----------------------------------------------|-----------------------------------------------|---------------------------------------------------------------|-------------------------------------|-------------------------------------|-----------------------------------------------|-----------------------------------------------|---------------------------------------------------------------|
|                                | Diameter time 1 (mm, mean $\pm$ SD) | Diameter time 2 (mm, mean $\pm$ SD) | Area time 1 (cm <sup>2</sup> , mean $\pm$ SD) | Area time 2 (cm <sup>2</sup> , mean $\pm$ SD) | Growth rate area (area, cm <sup>2</sup> /m*yr, mean $\pm$ SD) | Diameter time 1 (mm, mean $\pm$ SD) | Diameter time 2 (mm, mean $\pm$ SD) | Area time 1 (cm <sup>2</sup> , mean $\pm$ SD) | Area time 2 (cm <sup>2</sup> , mean $\pm$ SD) | Growth rate area (area, cm <sup>2</sup> /m*yr, mean $\pm$ SD) |
| <b>CoA</b>                     | 30.1 $\pm$ 6.8                      | 31.3 $\pm$ 7.1                      | 746.5 $\pm$ 328.3                             | 805.9 $\pm$ 356.9                             | 0.08 $\pm$ 0.1                                                | 28.7 $\pm$ 7.0                      | 29.8 $\pm$ 7.2                      | 681.1 $\pm$ 321.5                             | 737.2 $\pm$ 344.6                             | 0.08 $\pm$ 0.1                                                |
| <b>NoCoA</b>                   | 37.6 $\pm$ 5.5                      | 38.8 $\pm$ 5.2                      | 1134.3 $\pm$ 316.1                            | 1200.1 $\pm$ 313.6                            | 0.19 $\pm$ 0.5                                                | 36.4 $\pm$ 5.6                      | 37.5 $\pm$ 5.3                      | 1060.8 $\pm$ 317.6                            | 1124.1 $\pm$ 311.1                            | 0.2 $\pm$ 0.4                                                 |
| <b>ReCoA</b>                   | 29.1 $\pm$ 6.18                     | 30.3 $\pm$ 6.7                      | 694.7 $\pm$ 289.7                             | 752.5 $\pm$ 329.8                             | 0.08 $\pm$ 0.1                                                | 27.7 $\pm$ 6.3                      | 29.0 $\pm$ 6.8                      | 633.4 $\pm$ 281.3                             | 692.9 $\pm$ 320.7                             | 0.08 $\pm$ 0.1                                                |
| <b>Valve type 0</b>            | 32.4 $\pm$ 6.2                      | 33.4 $\pm$ 6.4                      | 853.2 $\pm$ 298.3                             | 905.1 $\pm$ 321.3                             | 0.1 $\pm$ 0.1                                                 | 31.1 $\pm$ 6.3                      | 32.1 $\pm$ 6.6                      | 788.1 $\pm$ 289.6                             | 840.5 $\pm$ 318.5                             | 0.1 $\pm$ 0.1                                                 |
| <b>Valve type 1, RL fusion</b> | 34.0 $\pm$ 7.4                      | 35.1 $\pm$ 7.5                      | 948.5 $\pm$ 388.3                             | 1011.6 $\pm$ 403.6                            | 0.1 $\pm$ 0.2                                                 | 32.6 $\pm$ 7.6                      | 33.8 $\pm$ 7.6                      | 880.4 $\pm$ 386.0                             | 940.4 $\pm$ 396.6                             | 0.1 $\pm$ 0.2                                                 |
| <b>Valve type 1, RN fusion</b> | 38.5 $\pm$ 4.3                      | 39.7 $\pm$ 3.9                      | 1177.3 $\pm$ 264.8                            | 1245.8 $\pm$ 247.6                            | 0.4 $\pm$ 1.1                                                 | 37.3 $\pm$ 4.4                      | 38.4 $\pm$ 3.9                      | 1104.2 $\pm$ 266.2                            | 1169.1 $\pm$ 241.5                            | 0.3 $\pm$ 0.7                                                 |

CoA= coarctation; RL= right coronary and left coronary; RN= right coronary and non-coronary.
